# Supplementary material for: Accelerated Discovery of the Polymer Blends for Cartilage Repair through Data-Mining Tools and Machine-Learning Algorithm
Source: MDPI journal article supplement (doi:10.3390/polym14091802), 2022-04-28
Supplement: s1 [file s1]

**Programming Code:**

```
install.packages('nnet')

library('nnet')

# Read the file in the .csv format
data.polymer <- read.csv("database.csv")

# Read the numerical variable in numerical format
data.polymer$input1 <- as.numeric (data.polymer$input1)
data.polymer$input2 <- as.numeric (data.polymer$input2)
data.polymer$input3 <- as.numeric (data.polymer$input3)
data.polymer$output1 <- as.numeric (data.polymer$output1)

# Read the categorical variable in numerical format
data.polymer$input1 <- as.numeric (data.polymer$input1)
data.polymer$input2 <- as.numeric (data.polymer$input2)
data.polymer$input3 <- as.numeric (data.polymer$input3)
data.polymer$output1 <- as.numeric (data.polymer$output1)

# In case the input has any missing value identify and take of the overall average value
data.polymer$Input1 = ifelse(is.na(data.polymer$Input1),
                             ave(data.polymer$Input1, FUN = function(x) mean(x, na.rm = TRUE)),
                             data.polymer$Input1)
data.polymer$Input2 = ifelse(is.na(data.polymer$Input2),
                             ave(data.polymer$Input2, FUN = function(x) mean(x, na.rm = TRUE)),
                             data.polymer$Input2)
data.polymer$Input3 = ifelse(is.na(data.polymer$ Input3),
                             ave(data.polymer$Input3, FUN = function(x) mean(x, na.rm = TRUE)),
                             data.polymer$Input3)

# In case the value between the three factors have variation there need to scale data
data.polymer[-1] <- scale(data.polymer[-1])

# Modelling of data using multinomial logistic regression
model <- multinom(Polymer ~ INPUT2+E+INPUT1, data=data.polymer)
```

```
# Checking for the models goodness of fit
```

```
multimodelfit1 <- multinom (data = data.polymer,  
                             Polymer ~ 1)
```

```
multimodelfit2 <- multinom (data = data.polymer,  
                             Polymer ~ variable)
```

```
anova(multimodelfit1, multimodelfit2)
```

```
# Predict the model inserting programmer desired input
```

```
y_pred = predict(model, data.frame(input1= range(seq(min:max)), input2 =range(seq(min:max)), input3  
= (min:max))
```
